# Supplementary material for: Association of region‐specific hippocampal reduction of neurogranin with inflammasome proteins in post mortem brains of Alzheimer's disease
Source: PubMed Central journal article supplement — Alzheimers Dement (N Y). 2024 Jan 22;10(1):e12444. doi: 10.1002/trc2.12444 (PMC10865487; doi:10.1002/trc2.12444), 2024-01-22
Supplement: TRC2-10-e12444-s001.pdf [file TRC2-10-e12444-s001.pdf]

## Supplementary Data 2

### Synaptophysin

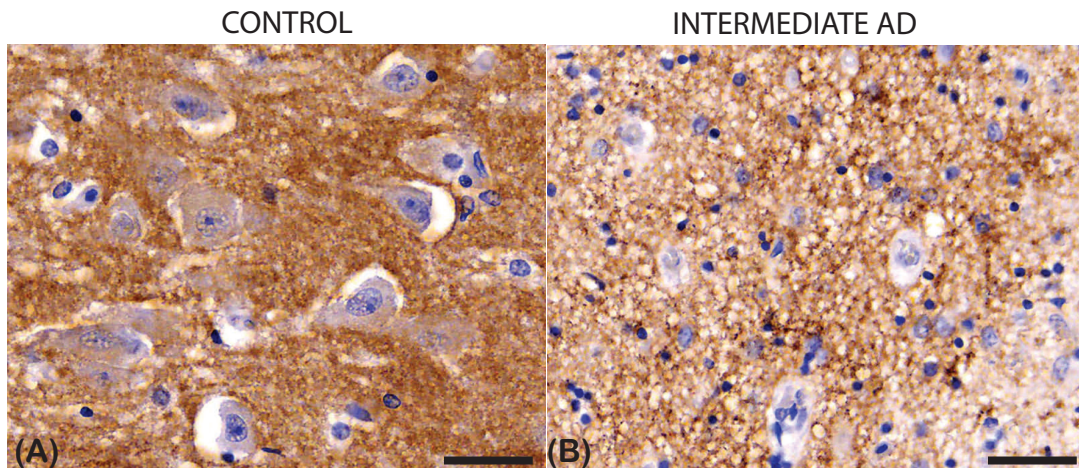

Images of Synaptophysin immunostaining in controls (A) and intermediate AD (B).

| Supplementary Table 2A                  |         |                 |         |              |
|-----------------------------------------|---------|-----------------|---------|--------------|
| Percent area stained with Synaptophysin |         |                 |         |              |
| Region                                  | Control | Intermediate AD | p Value | Significance |
| Entorhinal cortex                       | 70 ± 2  | 47 ± 14         | 0.23    | ns           |
| Subiculum                               | 76 ± 5  | 57 ± 7          | 0.026   | *            |
| CA1                                     | 67 ± 7  | 62 ± 7          | 0.59    | ns           |
| CA2                                     | 66 ± 8  | 57 ± 8          | 0.47    | ns           |
| CA3                                     | 63 ± 7  | 33 ± 6          | 0.0065  | **           |
| Dentate gyrus                           | 64 ± 4  | 28 ± 6          | 0.0004  | ***          |

T-test for each ROI, mean ± SD, pvalue and significance  
 Data is analyzed as percent area stained with Synaptophysin immunostaining in 1mm<sup>2</sup> area in AD cases and in controls  
 Cornu Ammonis (CA); not significant (ns); \*(p<0.05);\*\*(p<0.01);\*\*\*(p<0.001)

| Supplementary Table 2B                         |       |         |              |
|------------------------------------------------|-------|---------|--------------|
| Correlation: Ng+ cell counts and Synaptophysin |       |         |              |
| Region                                         |       |         |              |
| Control                                        | r     | p Value | Significance |
| Entorhinal cortex                              | -0.11 | 0.83    | ns           |
| Subiculum                                      | 0.82  | 0.06    | ns           |
| CA1                                            | 0.75  | 0.06    | ns           |
| CA2                                            | -0.16 | 0.73    | ns           |
| CA3                                            | 0.49  | 0.21    | ns           |
| Dentate gyrus                                  | 0.45  | 0.31    | ns           |
| Intermediate AD                                |       |         |              |
| Entorhinal cortex                              | -0.59 | 0.41    | ns           |
| Subiculum                                      | 0.5   | 0.31    | ns           |
| CA1                                            | -0.29 | 0.52    | ns           |
| CA2                                            | 0.6   | 0.15    | ns           |
| CA3                                            | 0.38  | 0.32    | ns           |
| Dentate gyrus                                  | 0.68  | 0.09    | ns           |

Pearson's Correlation Coefficient for each ROI, the r statistic, pvalue and significance  
 Cornu Ammonis (CA); not significant (ns)
