# Supplementary material for: Association of region‐specific hippocampal reduction of neurogranin with inflammasome proteins in post mortem brains of Alzheimer's disease
Source: PubMed Central journal article supplement — Alzheimers Dement (N Y). 2024 Jan 22;10(1):e12444. doi: 10.1002/trc2.12444 (PMC10865487; doi:10.1002/trc2.12444), 2024-01-22
Supplement: TRC2-10-e12444-s002.pdf [file TRC2-10-e12444-s002.pdf]

## Supplementary Data 5

# Ng correlation with IC100

### Control

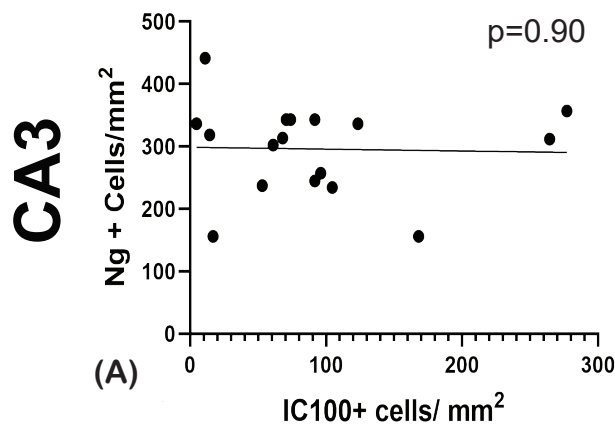

### Intermediate AD

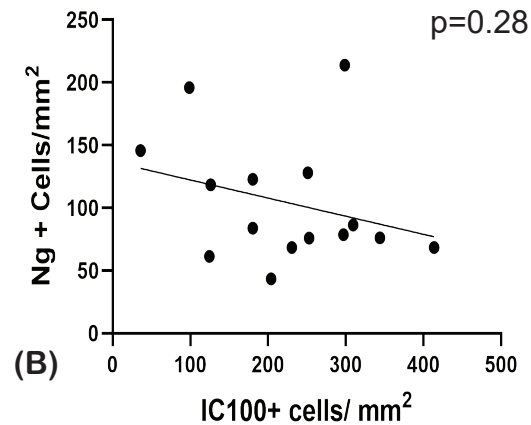

# Ng correlation with Mo ASC

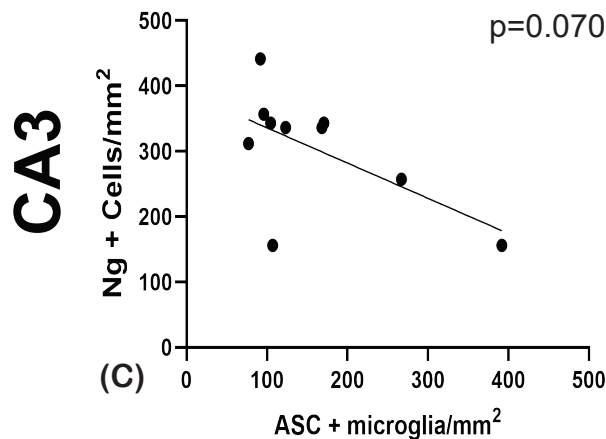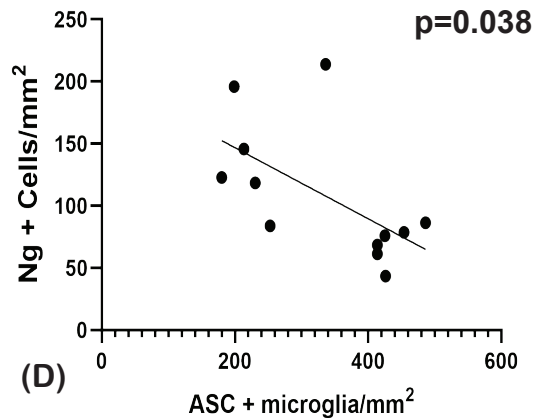

Additional correlation analysis of Ng and humanized anti-ASC and Ng and mouse anti-ASC seen in the hippocampal subfield CA3. In both the control and intermediate AD groups there was no significant relationship between the number of Ng-positive neurons and the number of ASC positive neurons (A and B). The intermediate AD cases showed a significant negative correlation between Ng counts and ASC positive microglia in the CA3, but the control cases there was no significant correlation. Alzheimer's disease (AD), cornu ammonis (CA), neurogranin (Ng), apoptosis-associated speck-like protein containing a caspase recruitment domain (ASC).
