# Supplementary material for: Association of region‐specific hippocampal reduction of neurogranin with inflammasome proteins in post mortem brains of Alzheimer's disease
Source: PubMed Central journal article supplement — Alzheimers Dement (N Y). 2024 Jan 22;10(1):e12444. doi: 10.1002/trc2.12444 (PMC10865487; doi:10.1002/trc2.12444), 2024-01-22
Supplement: TRC2-10-e12444-s003.pdf [file TRC2-10-e12444-s003.pdf]

| Supplementary Data 1.                                                                                                                                                                                                                                                                                                                                                                                                                                                                                                                                                                                                                                                                                                                        |        |     |       |   |   |   |              |                       |                                                                                     |           |
|----------------------------------------------------------------------------------------------------------------------------------------------------------------------------------------------------------------------------------------------------------------------------------------------------------------------------------------------------------------------------------------------------------------------------------------------------------------------------------------------------------------------------------------------------------------------------------------------------------------------------------------------------------------------------------------------------------------------------------------------|--------|-----|-------|---|---|---|--------------|-----------------------|-------------------------------------------------------------------------------------|-----------|
| Case Demographics                                                                                                                                                                                                                                                                                                                                                                                                                                                                                                                                                                                                                                                                                                                            |        |     |       |   |   |   |              |                       |                                                                                     |           |
|                                                                                                                                                                                                                                                                                                                                                                                                                                                                                                                                                                                                                                                                                                                                              | Age    | Sex | PMI   | A | C | B | Braak        | Clinical Assessment   | COD                                                                                 | RACE      |
| Control AD                                                                                                                                                                                                                                                                                                                                                                                                                                                                                                                                                                                                                                                                                                                                   |        |     |       |   |   |   |              |                       |                                                                                     |           |
| 1                                                                                                                                                                                                                                                                                                                                                                                                                                                                                                                                                                                                                                                                                                                                            | 88     | F   | 9.00  | 1 | 1 | 1 | Stage I      | No Cognitive Disorder | Arteriovascular sclerotic disease                                                   | Caucasian |
| 2                                                                                                                                                                                                                                                                                                                                                                                                                                                                                                                                                                                                                                                                                                                                            | 87     | M   | 8.00  | 1 | 0 | 1 | Stage I      | No Cognitive Disorder | Cardiac Arrest;Atherosclerotic Disease                                              | Caucasian |
| 3                                                                                                                                                                                                                                                                                                                                                                                                                                                                                                                                                                                                                                                                                                                                            | 86     | F   | 37.00 | 1 | 0 | 1 | Stage II     | No Cognitive Disorder | urethral cancer, heart murmur                                                       | Caucasian |
| 4                                                                                                                                                                                                                                                                                                                                                                                                                                                                                                                                                                                                                                                                                                                                            | 89     | F   | 4.55  | 1 | 1 | 1 | Stage I-II   | No Cognitive Disorder | Coronary Artery Disease;Atrial fibrillation;Hypertension                            | Caucasian |
| 5                                                                                                                                                                                                                                                                                                                                                                                                                                                                                                                                                                                                                                                                                                                                            | 96     | F   | 6.00  | 0 | 1 | 1 | Stage I-II   | No Cognitive Disorder | Generalized atherosclerosis                                                         | Caucasian |
| 6                                                                                                                                                                                                                                                                                                                                                                                                                                                                                                                                                                                                                                                                                                                                            | 91     | F   | 18.66 | 0 | 0 | 1 | Stage I      | No Cognitive Disorder | End Stage Congestive Heart Failure                                                  | Caucasian |
| 7                                                                                                                                                                                                                                                                                                                                                                                                                                                                                                                                                                                                                                                                                                                                            | 92     | F   | 22.30 | 1 | 0 | 1 | Stage II     | No Cognitive Disorder | Atherosclerotic Heart Disease                                                       | Caucasian |
| 8                                                                                                                                                                                                                                                                                                                                                                                                                                                                                                                                                                                                                                                                                                                                            | 72     | M   | 17.25 | 0 | 0 | 1 | Stage I      | No Cognitive Disorder | Atherosclerotic Coronary Artery Disease , Ischemic Cardiomyopathy                   | Caucasian |
| 9                                                                                                                                                                                                                                                                                                                                                                                                                                                                                                                                                                                                                                                                                                                                            | 72     | M   | 17.66 | 0 | 0 | 0 | Stage 0      | No Cognitive Disorder | Acute Myocardial Infarction;Diabetes Mellitus                                       | Caucasian |
| 10                                                                                                                                                                                                                                                                                                                                                                                                                                                                                                                                                                                                                                                                                                                                           | 73     | M   | 20.50 | 2 | 0 | 1 | Stage I      | No Cognitive Disorder | Atherosclerotic Heart Disease, Cardiomyopathy, Diabetes                             | Caucasian |
| 11                                                                                                                                                                                                                                                                                                                                                                                                                                                                                                                                                                                                                                                                                                                                           | 74     | F   | 34.9  | 1 | 0 | 1 | Stage I      | No Cognitive Disorder | chronic kidney disease                                                              | Caucasian |
| 12                                                                                                                                                                                                                                                                                                                                                                                                                                                                                                                                                                                                                                                                                                                                           | 67     | F   | 25.95 | 1 | 0 | 1 | Stage 1      | No Cognitive Disorder | Atherosclerotic Coronary Artery Disease, Tobacco Abuse, Hypertension                | Caucasian |
| 13                                                                                                                                                                                                                                                                                                                                                                                                                                                                                                                                                                                                                                                                                                                                           | 94     | M   | 23.40 | 2 | 0 | 1 | Stage 1      | No Cognitive Disorder | Congestive Heart Failure                                                            | Caucasian |
| 14                                                                                                                                                                                                                                                                                                                                                                                                                                                                                                                                                                                                                                                                                                                                           | 90     | F   | 24.30 | 1 | 1 | 1 | Stage II     | No Cognitive Disorder | Cardiac Arrest;Respiratory Arrest;Unspecified Natural Causes;Cardiovascular Disease | Caucasian |
| 15                                                                                                                                                                                                                                                                                                                                                                                                                                                                                                                                                                                                                                                                                                                                           | 93     | M   | 16.88 | 1 | 1 | 1 | Stage I-II   | No Cognitive Disorder | Cardiac Arrest;Atherosclerotic Disease                                              | Caucasian |
| 16                                                                                                                                                                                                                                                                                                                                                                                                                                                                                                                                                                                                                                                                                                                                           | 72     | M   | 24.28 | 1 | 0 | 0 | Stage 0      | No Cognitive Disorder | Acute Myocardial Infarction due to Hypertensive                                     | Caucasian |
| 17                                                                                                                                                                                                                                                                                                                                                                                                                                                                                                                                                                                                                                                                                                                                           | 102    | F   | 10.30 | 0 | 0 | 1 | Stage II     | No Cognitive Disorder | Arteriosclerotic Cardiovascular Disease Failure to thrive                           | Caucasian |
| Mean                                                                                                                                                                                                                                                                                                                                                                                                                                                                                                                                                                                                                                                                                                                                         | 84.588 |     | 18.88 |   |   |   |              |                       |                                                                                     |           |
| Intermediate AD                                                                                                                                                                                                                                                                                                                                                                                                                                                                                                                                                                                                                                                                                                                              |        |     |       |   |   |   |              |                       |                                                                                     |           |
| 1                                                                                                                                                                                                                                                                                                                                                                                                                                                                                                                                                                                                                                                                                                                                            | 92     | M   | 12.00 | 3 | 3 | 2 | Stage III-IV | Moderate              | Acute Renal Failure                                                                 | Caucasian |
| 2                                                                                                                                                                                                                                                                                                                                                                                                                                                                                                                                                                                                                                                                                                                                            | 90     | F   | 8.48  | 2 | 3 | 2 | Stage III    | MCI                   | Acute Renal Failure                                                                 | Caucasian |
| 3                                                                                                                                                                                                                                                                                                                                                                                                                                                                                                                                                                                                                                                                                                                                            | 90     | F   | 22.12 | 2 | 3 | 2 | Stage III-IV | Severe                | Advanced Dementia;vascular                                                          | Caucasian |
| 4                                                                                                                                                                                                                                                                                                                                                                                                                                                                                                                                                                                                                                                                                                                                            | 91     | F   | 15.00 | 3 | 2 | 2 | Stage III    | MCI                   | Lung cancer                                                                         | Caucasian |
| 5                                                                                                                                                                                                                                                                                                                                                                                                                                                                                                                                                                                                                                                                                                                                            | 79     | F   | 18.28 | 2 | 3 | 2 | Stage III    | Moderate              | Cardiac Arrest;Atherosclerotic Disease                                              | Caucasian |
| 6                                                                                                                                                                                                                                                                                                                                                                                                                                                                                                                                                                                                                                                                                                                                            | 82     | M   | 17.60 | 2 | 3 | 2 | Stage III-IV | Moderate              | Cardiac Arrest;Atherosclerotic Disease                                              | Caucasian |
| 7                                                                                                                                                                                                                                                                                                                                                                                                                                                                                                                                                                                                                                                                                                                                            | 94     | F   | 18.45 | 2 | 2 | 2 | Stage III-IV | MCI                   | Cardiopulmonary Arrest                                                              | Caucasian |
| 8                                                                                                                                                                                                                                                                                                                                                                                                                                                                                                                                                                                                                                                                                                                                            | 82     | M   | 18.22 | 2 | 2 | 2 | Stage III-IV | Moderate              | Cardiac Arrest;Vascular Dementia                                                    | Caucasian |
| 9                                                                                                                                                                                                                                                                                                                                                                                                                                                                                                                                                                                                                                                                                                                                            | 87     | M   | 13.91 | 2 | 3 | 3 | Stage V-VI   | Moderate              | Sepsis due to urinary tract infection                                               | Caucasian |
| 10                                                                                                                                                                                                                                                                                                                                                                                                                                                                                                                                                                                                                                                                                                                                           | 80     | M   | 10.53 | 3 | 2 | 3 | Stage V-VI   | MCI                   | Cardiac Arrest;Atherosclerotic Disease                                              | Caucasian |
| 11                                                                                                                                                                                                                                                                                                                                                                                                                                                                                                                                                                                                                                                                                                                                           | 78     | M   | 14.51 | 2 | 2 | 2 | Stage III-IV | Moderate              | Cardiac Arrest;Atherosclerotic Disease                                              | Caucasian |
| 12                                                                                                                                                                                                                                                                                                                                                                                                                                                                                                                                                                                                                                                                                                                                           | 78     | F   | 6.00  | 2 | 2 | 2 | Stage III-IV | Moderate              | Cardiac Arrest;Atherosclerotic Disease                                              | Caucasian |
| 13                                                                                                                                                                                                                                                                                                                                                                                                                                                                                                                                                                                                                                                                                                                                           | 79     | F   | 6.40  | 1 | 3 | 3 | Stage V-VI   | Severe                | Cardiac Arrest;Atherosclerotic Disease                                              | Caucasian |
| 14                                                                                                                                                                                                                                                                                                                                                                                                                                                                                                                                                                                                                                                                                                                                           | 66     | F   | 44.25 | 3 | 3 | 2 | Stage III-IV | Moderate              | Urinary Tract Infection                                                             | Caucasian |
| 15                                                                                                                                                                                                                                                                                                                                                                                                                                                                                                                                                                                                                                                                                                                                           | 83     | M   | 15.12 | 2 | 2 | 2 | Stage III-IV | Moderate              | Liver Failure                                                                       | Caucasian |
| 16                                                                                                                                                                                                                                                                                                                                                                                                                                                                                                                                                                                                                                                                                                                                           | 77     | F   | 10.75 | 2 | 2 | 2 | Stage III    | Moderate              | Cardiac Arrest;Atherosclerotic Disease                                              | Caucasian |
| 17                                                                                                                                                                                                                                                                                                                                                                                                                                                                                                                                                                                                                                                                                                                                           | 90     | F   | 13.25 | 2 | 1 | 2 | Stage III-IV | Moderate              | Lung Cancer                                                                         | Caucasian |
| Mean                                                                                                                                                                                                                                                                                                                                                                                                                                                                                                                                                                                                                                                                                                                                         | 83.412 |     | 15.58 |   |   |   |              |                       |                                                                                     |           |
| PMI=postmortem interval; Yr=year; A Score=Aβ immunopositivity, Thal Phase; C Score=neuritic plaque density, CERAD; B Score=Neurofibrillary tangles; COD= Cause of Death; AD= Alzheimer's disease; M = male; F = female; No Cognitive Disorder ≥ 62 % on Modified Telephone Interview for Cognitive Status (TICS-M) score; MCI=Mild Cognitive Impairment (TICS-M score 61-54%); Moderate=Moderate dementia (TICS-M score 53-36%); Severe=Severe dementia ; Case data published in Vontell, Regina T et al. "Identification of inflammasome signaling proteins in neurons and microglia in early and intermediate stages of Alzheimer's disease." <i>Brain pathology (Zurich, Switzerland)</i> vol. 33,4 (2023): e13142. doi:10.1111/bpa.13142 |        |     |       |   |   |   |              |                       |                                                                                     |           |

Intermediate AD pathology is defined as the presence of sparse to moderate diffuse and neuritic beta-amyloid plaques (i.e., 6-20 neuritic plaques per 1 mm<sup>2</sup>) and moderate hyperphosphorylated tau-positive NFTs (e.g., neuropathology scores of B2 or B3; Braak III-IV) seen in the CA1-CA3 regions of the hippocampus.

## A review of Immunohistochemical procedure.

All slides were incubated overnight at 4°C in a solution of either, mouse anti-Ng-2 (gift from UGOT, 1.5 µg/ml), mouse anti-MAP2 (0.5 µg/ml; Sigma), mouse anti-pTau (AT-8; 0.5 µg/ml; Sigma), mouse anti-Tau (GT-38; 0.1 µg/ml; Abcam), polyclonal rabbit anti-Synaptophysin (0.6 µg/ml; Abcam) or mouse anti-beta Amyloid (0.2 µg/ml; Sigma) in PBS. The next day, sections were exposed to biotinylated horse-anti-mouse IgG (15 µg/ml; Vector Laboratories) or goat-anti-rabbit IgG (15 µg/ml; Vector Laboratories) in PBS for 1 h followed by avidin-biotin complex for 1 h (1:200, ABC; Vector Laboratories). Reactions were visualized with 3,3'-diaminobenzidine (MilliporeSigma) for 10 min. Finally, the sections were dehydrated, cleared in xylene, and cover slipped. As negative low AD, we performed staining in the absence of the primary antibodies and no specific staining was identified in these preparations.

## A review of Immunofluorescence Labelling procedures

The mouse monoclonal primary Ng antibody (1.5 µg/ml) was compatible with the humanized antibody anti-ASC (0.1 µg/ml) mixed in a cocktail solution. Sections were pretreated as described above and blocked in 5% goat serum for 20 min before the primary antibodies were applied and incubated overnight at 4°C. Following primary antibody incubation, sections were rinsed three times in PBS, for 3 min each time before these secondary antibodies were added. The samples were finally soaked for 1.5 h in PBS containing the following secondary antibody cocktail: goat anti-mouse IgG conjugated to Alexa Fluor 488 (4 µg/ml; Invitrogen, Eugene, Oreg., USA) and goat anti-human IgG conjugated to Alexa Fluor 546 (4 µg/ml; Invitrogen).

To co-label the Ng with incompatible markers, such as, mouse anti-ASC (B-3; Santa Cruz Biotechnology, Santa Cruz, CA.), the monoclonal antibodies were applied separately. Thus, after the sections were blocked in 5% goat serum for 20 min, the anti-Ng and human ASC cocktail was applied and incubated overnight at 4°C. The sections were rinsed three times in PBS, for 3 min each time and were soaked for 1.5 h in PBS containing goat anti-mouse IgG conjugated to Alexa Fluor 488 (4 µg/ml; Invitrogen) and goat anti-human IgG conjugated to Alexa Fluor 546 (4 µg/ml; Invitrogen) followed by several rinses in PBS and postfixation in 4% paraformaldehyde for 20 min. The marker mouse anti-ASC (0.4 µg/mL), which stains the microglia as previously described in 23 was conjugated to Alexa Fluor 647 (4 µg/ml; Invitrogen) and the slides were incubated for 3 hrs, then the sections were rinsed in several changes of PBS and postfixed in 4% paraformaldehyde for 10 mins. Finally, the sections were placed under a coverslip using ProLong Gold antifade

## A overview of formulas and details used to quantify the staining results.

Ng, MAP2, Tau (GT-38) and Synaptophysin staining was performed by RV in the hippocampal sub regions including the the Dentate Gyrus (DG); CA3; CA2 and CA1. For the Ng, MAP2 and GT-38 counts, three contours from each region of interest (ROI) were taken from the CA1, CA2, CA3, the subiculum, and the adjacent DG, which encompassed an average area of 3.2 mm<sup>2</sup> per region using the Image-Pro Premier (Media Cybernetics) program

For each region, the CA scans encompassed all layers of the strata. Tissue scans were reviewed (by RV) to ensure that counts had met the criteria to avoid duplication of counts (e.g., an area containing an Ng or MAP2-positive nucleus [ $>10 \mu\text{m}^2$ ] connected positive processes. In a pilot study, we confirmed that the counting profile described previously counted the correct number of labeled cells and nuclei (using an ImageJ cell counter). Estimation of number density was performed by applying the following formula:

$$N = (\Sigma Q^-) / V$$

Where N is the total number of cells or clusters per volume of brain region;  $\Sigma Q^-$  is the number of counted cells; and V is the volume of regions of interest per sampling frame.

The Ng morphological changes were ascertained by using a circularity measure, which was calculated by the equation:

$$4A / \pi * \text{MaxFeret}^2$$

Where A = area and MaxFeret = the distance between two parallel tangential lines (Media Cybernetics); a value of 0 indicates a flat (line) object, a value of 1 indicates a perfect circular object.

The staining synaptophysin data was obtained from software-derived annotations that accurately identified immune-positivity and the software efficiently identified the percent area stained using the formula:

$$\% \text{ Stained Area} = (\text{sum}(\text{area of stained with synaptophysin}) / (\text{ROI area})) * 100$$

Each of the ROIs area was limited to 1 mm<sup>2</sup> to normalize the data.
