# Supplementary material for: Association of region‐specific hippocampal reduction of neurogranin with inflammasome proteins in post mortem brains of Alzheimer's disease
Source: PubMed Central journal article supplement — Alzheimers Dement (N Y). 2024 Jan 22;10(1):e12444. doi: 10.1002/trc2.12444 (PMC10865487; doi:10.1002/trc2.12444), 2024-01-22
Supplement: TRC2-10-e12444-s004.pdf [file TRC2-10-e12444-s004.pdf]

## Supplementary Data 4

| Supplementary Table 5                                                                                                                |        |         |              |
|--------------------------------------------------------------------------------------------------------------------------------------|--------|---------|--------------|
| Correlation: Ng+ cell counts and $\beta$ -Amyloid                                                                                    |        |         |              |
| Region                                                                                                                               |        |         |              |
| Control                                                                                                                              | r      | p Value | Significance |
| Entorhinal cortex                                                                                                                    | 0.61   | 0.15    | ns           |
| Subiculum                                                                                                                            | -0.006 | 0.99    | ns           |
| CA1                                                                                                                                  | -0.19  | 0.64    | ns           |
| CA2                                                                                                                                  | 0.3    | 0.46    | ns           |
| CA3                                                                                                                                  | -0.45  | 0.27    | ns           |
| Dentate gyrus                                                                                                                        | 0.54   | 0.17    | ns           |
| Intermediate AD                                                                                                                      |        |         |              |
| Entorhinal cortex                                                                                                                    | -0.013 | 0.98    | ns           |
| Subiculum                                                                                                                            | -0.49  | 0.22    | ns           |
| CA1                                                                                                                                  | 0.23   | 0.59    | ns           |
| CA2                                                                                                                                  | 0.079  | 0.85    | ns           |
| CA3                                                                                                                                  | -0.32  | 0.44    | ns           |
| Dentate gyrus                                                                                                                        | -0.034 | 0.94    | ns           |
| Pearson's Correlation Coefficient for each ROI, the r statistic, pvalue and significance<br>Cornu Ammonis (CA); not significant (ns) |        |         |              |
