# Supplementary material for: Association of region‐specific hippocampal reduction of neurogranin with inflammasome proteins in post mortem brains of Alzheimer's disease
Source: PubMed Central journal article supplement — Alzheimers Dement (N Y). 2024 Jan 22;10(1):e12444. doi: 10.1002/trc2.12444 (PMC10865487; doi:10.1002/trc2.12444), 2024-01-22
Supplement: TRC2-10-e12444-s006.pdf [file TRC2-10-e12444-s006.pdf]

## Supplementary Data 3

### GT-38

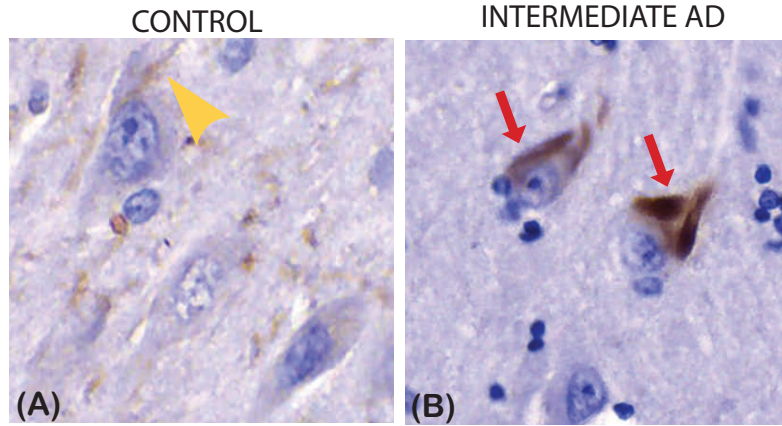

Images of AD specific tau formation (GT-38). In controls, (A), sparse amounts of immunoreactivity is seen in the cytoplasm of a few neurons (yellow arrow head), whereas, the paired helical filament conformational formation is seen in a moderate density of the neurons in the intermediate AD (B) cases (red arrows).

| Supplementary Table 3A       |         |                 |         |              |
|------------------------------|---------|-----------------|---------|--------------|
| GT-38 Immunopositive Neurons |         |                 |         |              |
| Region                       | Control | Intermediate AD | p Value | Significance |
| Entorhinal cortex            | 12 ± 4  | 42 ± 7          | 0.002   | **           |
| Subiculum                    | 11 ± 4  | 43 ± 8          | 0.002   | **           |
| CA1                          | 7 ± 2   | 47 ± 10         | 0.001   | **           |
| CA2                          | 11 ± 3  | 39 ± 9          | 0.02    | *            |
| CA3                          | 12 ± 1  | 42 ± 9          | 0.002   | **           |
| Dentate gyrus                | 8 ± 2   | 20 ± 4          | 0.006   | **           |

T-test for each ROI, mean ± SD, pvalue and significance  
 Counts are expressed as GT-38 positive neurofibrillary tangles (NFTs) in 1mm<sup>2</sup> area in AD cases and in controls.  
 Cornu Ammonis (CA); \*(p<0.05);\*\*(p<0.01)

| Supplementary Table 3B                                                     |       |         |              |
|----------------------------------------------------------------------------|-------|---------|--------------|
| Correlation: Ng+ cell counts and conformational selective tau (GT-38) NFTs |       |         |              |
| Control                                                                    |       |         |              |
| Region                                                                     | r     | p Value | Significance |
| Entorhinal cortex                                                          | -0.5  | 0.26    | ns           |
| Subiculum                                                                  | 0.22  | 0.63    | ns           |
| CA1                                                                        | 0.46  | 0.3     | ns           |
| CA2                                                                        | 0.3   | 0.4     | ns           |
| CA3                                                                        | -0.07 | 0.88    | ns           |
| Dentate gyrus                                                              | -0.55 | 0.2     | ns           |
| Intermediate AD                                                            |       |         |              |
| Entorhinal cortex                                                          | 0.11  | 0.78    | ns           |
| Subiculum                                                                  | -0.34 | 0.36    | ns           |
| CA1                                                                        | -0.53 | 0.15    | ns           |
| CA2                                                                        | 0.12  | 0.73    | ns           |
| CA3                                                                        | -0.42 | 0.26    | ns           |
| Dentate gyrus                                                              | 0.35  | 0.36    | ns           |

Pearson's Correlation Coefficient for each ROI, the r statistic, pvalue and significance  
 Cornu Ammonis (CA); not significant (ns)
